# Supplementary material for: Dual Modification of Sago Starch via Heat Moisture Treatment and Octenyl Succinylation to Improve Starch Hydrophobicity
Source: MDPI journal article supplement (doi:10.3390/polym14061086), 2022-03-08
Supplement: s1 [file s1]

## Article

# Dual Modification of Sago Starch via Heat Moisture Treatment and Octenyl Succinylation to Improve Starch Hydrophobicity

Angela Myrra Puspita Dewi <sup>1,2</sup>, Umar Santoso <sup>1</sup>, Yudi Pranoto <sup>1</sup> and Djagal W. Marseno <sup>1,\*</sup>

<sup>1</sup> Department of Food and Agricultural Product Technology, Faculty of Agricultural Technology, Gadjah Mada University, Yogyakarta, 55281 Indonesia; a.puspita@unipa.ac.id (A.M.P.D.); umar\_s@ugm.ac.id (U.S.); pranoto@ugm.ac.id (Y.P.)

<sup>2</sup> Department of Agricultural Technology, Faculty of Agricultural Technology, Papua University, Manokwari, 98314 Indonesia

\* Correspondence: djagal@ugm.ac.id

## Supplementary Data

**Table S1.** Intensity of X-Ray Diffractogram of native and HMT sago starches.

| Sample | Intensity at 2theta      |                          |                            |                           |                          |                          | Crystallinity (%)        |
|--------|--------------------------|--------------------------|----------------------------|---------------------------|--------------------------|--------------------------|--------------------------|
|        | 5.57°                    | 15.06°                   | 17.12°                     | 18.07°                    | 23.01°                   | 26.7°                    |                          |
| Native | 1357±22.63 <sup>a</sup>  | 3357±13.43 <sup>a</sup>  | 4036±49.50 <sup>a</sup>    | 3825±36.77 <sup>a</sup>   | 3176±21.21 <sup>ab</sup> | 1739±38.13 <sup>8a</sup> | 36.57±1.20 <sup>a</sup>  |
| HMT 10 | 1219±16.26 <sup>bc</sup> | 3413±14.14 <sup>a</sup>  | 3976±67.18 <sup>a</sup>    | 3917±69.30 <sup>a</sup>   | 3269±19.80 <sup>a</sup>  | 1709±4.95 <sup>a</sup>   | 36.74±0.30 <sup>a</sup>  |
| HMT 15 | 1338±101.1 <sup>b</sup>  | 3495±80.61 <sup>a</sup>  | 4002±4.24 <sup>a</sup>     | 3892±2.83 <sup>a</sup>    | 3261±10.61 <sup>a</sup>  | 1709±16.93 <sup>7a</sup> | 35.75±2.75 <sup>a</sup>  |
| HMT 20 | 1119±109.6 <sup>c</sup>  | 3440±3.54 <sup>a</sup>   | 3874.5±19.0 <sup>9ab</sup> | 3893±1.41 <sup>a</sup>    | 3239±41.01 <sup>ab</sup> | 1664±33.93 <sup>4a</sup> | 32.30±1.65 <sup>ab</sup> |
| HMT 25 | 1154±91.92 <sup>bc</sup> | 3391±159.0 <sup>9a</sup> | 3698±61.52 <sup>b</sup>    | 3740±36.77 <sup>c</sup>   | 3033±59.40 <sup>ab</sup> | 1719±78.43 <sup>9a</sup> | 30.16±1.25 <sup>b</sup>  |
| HMT 30 | 1150±52.33 <sup>bc</sup> | 3094±53.03 <sup>a</sup>  | 3610±149.91 <sup>c</sup>   | 3634±112.4 <sup>3bc</sup> | 3009±219.2 <sup>b</sup>  | 1702±25.42 <sup>6a</sup> | 28.70±2.76 <sup>b</sup>  |

<sup>†</sup> Data are expressed as means ± SD. Mean values with the same letters within a column are not significantly ( $p < 0.05$ ) different. HMT 10: modified HMT sago starch with moisture level 10% treatment; HMT 15: modified HMT sago starch with moisture level 15% treatment; HMT 20: modified HMT sago starch with moisture level 20% treatment; HMT 25: modified HMT sago starch with moisture level 25% treatment; HMT 30: modified HMT sago starch with moisture level 30% treatment.
